# Supplementary material for: Intradermal Fractional ChAdOx1 nCoV-19 Booster Vaccine Induces Memory T Cells: A Follow-Up Study
Source: MDPI journal article supplement (doi:10.3390/vaccines12020109), 2024-01-23
Supplement: s1 [file s1]

## Supplementary Information

**Supplementary Table S1.** Amino acid sequences of SARS-CoV-2 S1 peptides (ProImmune).

| Peptide number | Amino acid start position | Sequence         |
|----------------|---------------------------|------------------|
| 1              | 1                         | MFVFLVLLPLVSSQC  |
| 2              | 6                         | VLLPLVSSQCVNLTT  |
| 3              | 11                        | VSSQCVNLTTTRTQLP |
| 4              | 16                        | VNLTTTRTQLPPAYTN |
| 5              | 21                        | RTQLPPAYTNSFTRG  |
| 6              | 26                        | PAYTNSFTRGVYYPD  |
| 7              | 31                        | SFTRGVYYPDKVFRS  |
| 8              | 36                        | VYYPDKVFRSSVLHS  |
| 9              | 41                        | KVFRSSVLHSTQDLF  |
| 10             | 46                        | SVLHSTQDLFLPFFS  |
| 11             | 51                        | TQDLFLPFFSNVTWF  |
| 12             | 56                        | LPFFSNVTWFHAIHV  |
| 13             | 61                        | NVTWFHAIHVS GTNG |
| 14             | 66                        | HAIHVS GTNGTKRFD |
| 15             | 71                        | SGTNGTKRFDNPVLP  |
| 16             | 76                        | TKRFDNPVLPFNDGV  |
| 17             | 81                        | NPVLPFNDGVYFAST  |
| 18             | 86                        | FNDGVYFASTEKSNI  |
| 19             | 91                        | YFASTEKSNIIRGWI  |
| 20             | 96                        | EKSNIIRGWIFGTTL  |
| 21             | 101                       | IRGWIFGTTLDSKTQ  |
| 22             | 106                       | FGTTLDSKTQSLIV   |
| 23             | 111                       | DSKTQSLIVNNATN   |
| 24             | 116                       | SLIVNNATNVVIKV   |
| 25             | 121                       | NNATNVVIKVCEFQF  |
| 26             | 126                       | VVIKVCEFQFCNDPF  |
| 27             | 131                       | CEFQFCNDPFLGVYY  |

| Peptide number | Amino acid start position | Sequence        |
|----------------|---------------------------|-----------------|
| 28             | 136                       | CNDPFLGVYYHKNNK |
| 29             | 141                       | LGVYYHKNNKSWMES |
| 30             | 146                       | HKNNKSWMESEFRVY |
| 31             | 151                       | SWMESEFRVYSSANN |
| 32             | 156                       | EFRVYSSANNCTFEY |
| 33             | 161                       | SSANNCTFEYVSQPF |
| 34             | 166                       | CTFEYVSQPFLMDLE |
| 35             | 171                       | VSQPFLMDLEGKQGN |
| 36             | 176                       | LMDLEGKQGNFKNLR |
| 37             | 181                       | GKQGNFKNLREFVFK |
| 38             | 186                       | FKNLREFVFKNIDGY |
| 39             | 191                       | EFVFKNIDGYFKIYS |
| 40             | 196                       | NIDGYFKIYSKHTPI |
| 41             | 201                       | FKIYSKHTPINLVRD |
| 42             | 206                       | KHTPINLVRDLPQGF |
| 43             | 211                       | NLVRDLPQGFSALEP |
| 44             | 216                       | LPQGFSALEPLVDLP |
| 45             | 221                       | SALEPLVDLPIGINI |
| 46             | 226                       | LVDLPIGINITRFQT |
| 47             | 231                       | IGINITRFQTLLALH |
| 48             | 236                       | TRFQTLLALHRSYLT |
| 49             | 241                       | LLALHRSYLTPGDSS |
| 50             | 246                       | RSYLTPGDSSSGWTA |
| 51             | 251                       | PGDSSSGWTAGAAAY |
| 52             | 256                       | SGWTAGAAAYYVGYL |
| 53             | 261                       | GAAAYYVGYLQPRTF |
| 54             | 266                       | YVGYLQPRTFLLKYN |
| 55             | 271                       | QPRTFLLKYNENGTI |
| 56             | 276                       | LLKYNENGTITDAVD |
| 57             | 281                       | ENGTITDAVDCALDP |

| Peptide number | Amino acid start position | Sequence         |
|----------------|---------------------------|------------------|
| 58             | 286                       | TDAVDCALDPLSETK  |
| 59             | 291                       | CALDPLSETKCTLKS  |
| 60             | 296                       | LSETKCTLKSFTVEK  |
| 61             | 301                       | CTLKSFTVEKGIYQT  |
| 62             | 306                       | FTVEKGIYQTSNFRV  |
| 63             | 311                       | GIYQTSNFRVQPTES  |
| 64             | 316                       | SNFRVQPTESIVRFP  |
| 65             | 321                       | QPTESIVRFPNITNL  |
| 66             | 326                       | IVRFPNITNLCPFGE  |
| 67             | 331                       | NITNLCPFGEVFNAT  |
| 68             | 336                       | CPFGEVFNATRFASV  |
| 69             | 341                       | VFNATRFASVYAWNR  |
| 70             | 346                       | RFASVYAWNRKRISN  |
| 71             | 351                       | YAWNRKRISNCVADY  |
| 72             | 356                       | KRISNCVADYSVLYN  |
| 73             | 361                       | CVADYSVLYNSASF   |
| 74             | 366                       | SVLYNSASFSTFKCY  |
| 75             | 371                       | SASFSTFKCYGVSPT  |
| 76             | 376                       | TFKCYGVSPTKLNDL  |
| 77             | 381                       | GVSPTKLNDLCFTNV  |
| 78             | 386                       | KLNDLCFTNVYADSF  |
| 79             | 391                       | CFTNVYADSFVIRGD  |
| 80             | 396                       | YADSFVIRGDEVIRQI |
| 81             | 401                       | VIRGDEVIRQIAPGQT |
| 82             | 406                       | EVIRQIAPGQTGKIAD |
| 83             | 411                       | APGQTGKIADYNYKL  |
| 84             | 416                       | GKIADYNYKLPPDFT  |
| 85             | 421                       | YNYKLPPDFTGCVIA  |
| 86             | 426                       | PPDFTGCVIAWNSNN  |
| 87             | 431                       | GCVIAWNSNNLDSKV  |

| Peptide number | Amino acid start position | Sequence        |
|----------------|---------------------------|-----------------|
| 88             | 436                       | WNSNNLDSKVGGNYN |
| 89             | 441                       | LDSKVGGNYNYLYRL |
| 90             | 446                       | GGNYNYLYRLFRKSN |
| 91             | 451                       | YLYRLFRKSNLKPFE |
| 92             | 456                       | FRKSNLKPFERDIST |
| 93             | 461                       | LKPFERDISTEIYQA |
| 94             | 466                       | RDISTEIYQAGSTPC |
| 95             | 471                       | EIYQAGSTPCNGVEG |
| 96             | 476                       | GSTPCNGVEGFNCYF |
| 97             | 481                       | NGVEGFNCYFPLQSY |
| 98             | 486                       | FNCYFPLQSYGFQPT |
| 99             | 491                       | PLQSYGFQPTNGVG  |
| 100            | 496                       | GFQPTNGVGYPYRV  |
| 101            | 501                       | NGVGYPYRVVLSF   |
| 102            | 506                       | QPYRVVLSFELLHA  |
| 103            | 511                       | VVLSFELLHAPATVC |
| 104            | 516                       | ELLHAPATVCGPKKS |
| 105            | 521                       | PATVCGPKKSTNLVK |
| 106            | 526                       | GPKKSTNLVKNKCVN |
| 107            | 531                       | TNLVKNKCVNFNFN  |
| 108            | 536                       | NKCVNFNFNGLTGTG |
| 109            | 541                       | FNFNGLTGTGVLTES |
| 110            | 546                       | LTGTGVLTESNKKFL |
| 111            | 551                       | VLTESNKKFLPFQQF |
| 112            | 556                       | NKKFLPFQQFGRDIA |
| 113            | 561                       | PFQQFGRDIADTTDA |
| 114            | 566                       | GRDIADTTDAVRDPQ |
| 115            | 571                       | DTTDAVRDPQTLEIL |
| 116            | 576                       | VRDPQTLEILDITPC |
| 117            | 581                       | TLEILDITPCSFGGV |

| Peptide number | Amino acid start position | Sequence        |
|----------------|---------------------------|-----------------|
| 118            | 586                       | DITPCSFGGVSVITP |
| 119            | 591                       | SFGGVSVITPGTNTS |
| 120            | 596                       | SVITPGTNTSNQVAV |
| 121            | 601                       | GTNTSNQVAVLYQDV |
| 122            | 606                       | NQVAVLYQDVNCTEV |
| 123            | 611                       | LYQDVNCTEVPVAIH |
| 124            | 616                       | NCTEVPVAIHADQLT |
| 125            | 621                       | PVAIHADQLTPTWRV |
| 126            | 626                       | ADQLTPTWRVYSTGS |
| 127            | 631                       | PTWRVYSTGSNVFQT |
| 128            | 636                       | YSTGSNVFQTRAGCL |
| 129            | 641                       | NVFQTRAGCLIGAEH |
| 130            | 646                       | RAGCLIGAEHVNNSY |
| 131            | 651                       | IGAEHVNNSYECDIP |
| 132            | 656                       | VNNSYECDIPIGAGI |
| 133            | 661                       | ECDIPIGAGICASYQ |
| 134            | 666                       | IGAGICASYQTQTNS |

**Supplementary Table S2.** Fluorochrome-conjugated antibodies for flow cytometry analysis.

| Antibody | Fluorochrome | Dilution | Clone | Cat no. | Source     |
|----------|--------------|----------|-------|---------|------------|
| FSC      | -            | -        | -     | -       | -          |
| SSC      | -            | -        | -     | -       | -          |
| CD3      | BV515        | 1:400    | SK7   | 563789  | BD Horizon |
| CD4      | APC-H7       | 1:200    | SK3   | 641398  | BD         |
| CD8      | APC          | 1:200    | SK1   | 340584  | BD         |
| CD45RO   | BV650        | 1:100    | UCHL1 | 563750  | BD Horizon |

|               |                          |        |        |        |               |
|---------------|--------------------------|--------|--------|--------|---------------|
| CCR7          | BB515                    | 1:100  | 150503 | 561271 | BD Horizon    |
| L/D           | Fixable aqua 405 (BV510) | 1:1000 | -      | -      | BD            |
| INF-<br>Gamma | PE-Cy7                   | 1:100  | B27    | 557643 | BD pharmingen |
| TNF-Alpha     | PE-CF594                 | 1:100  | MAb11  | 562784 | BD Horizon    |

### Anti-RBD IgG (BAU/mL) at Day 90 after booster dose

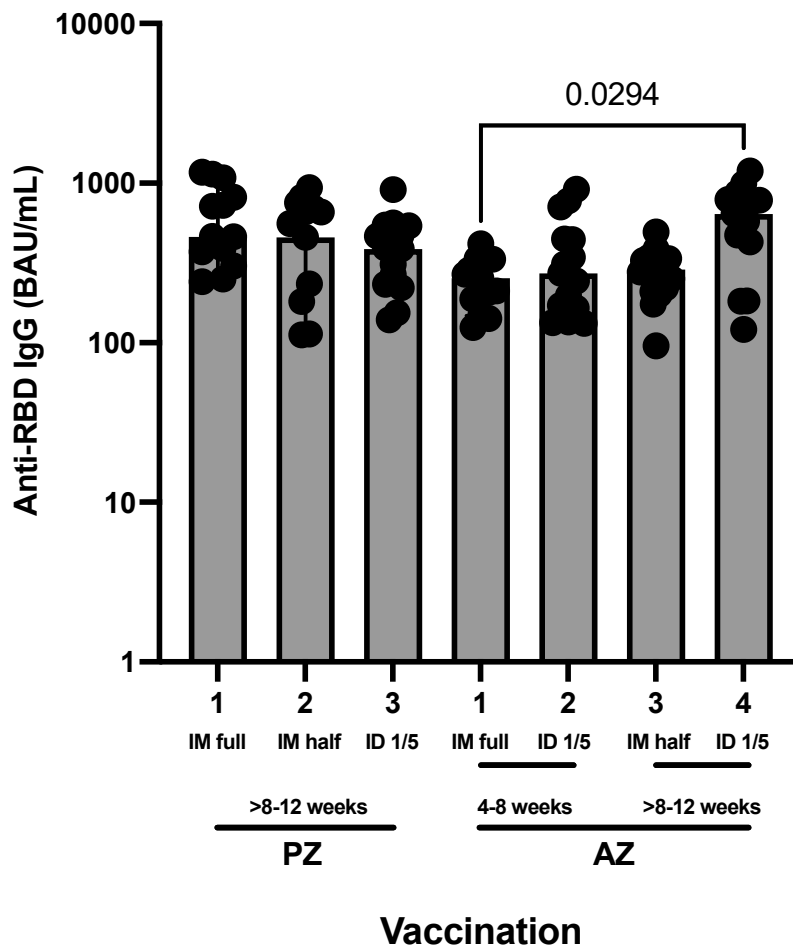

**Supplementary Figure S1.** Antibody responses (anti-RBD IgG) three months after ChAdOx1 nCoV-19 vaccine and BNT162b2 mRNA vaccine booster administration.

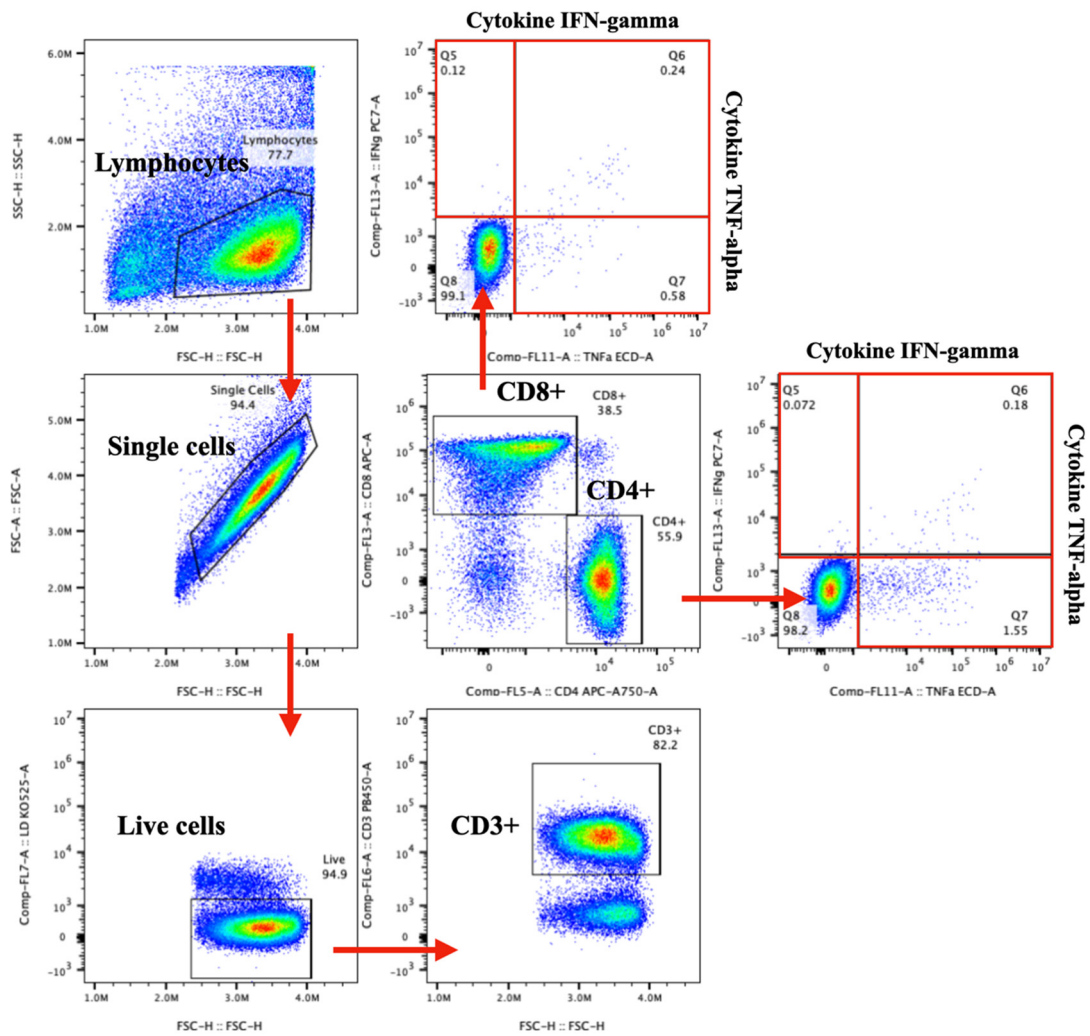

**Supplementary Figure S2.** Gating strategies for selecting CD4<sup>+</sup> and CD8<sup>+</sup> T cell populations and cytokine production.

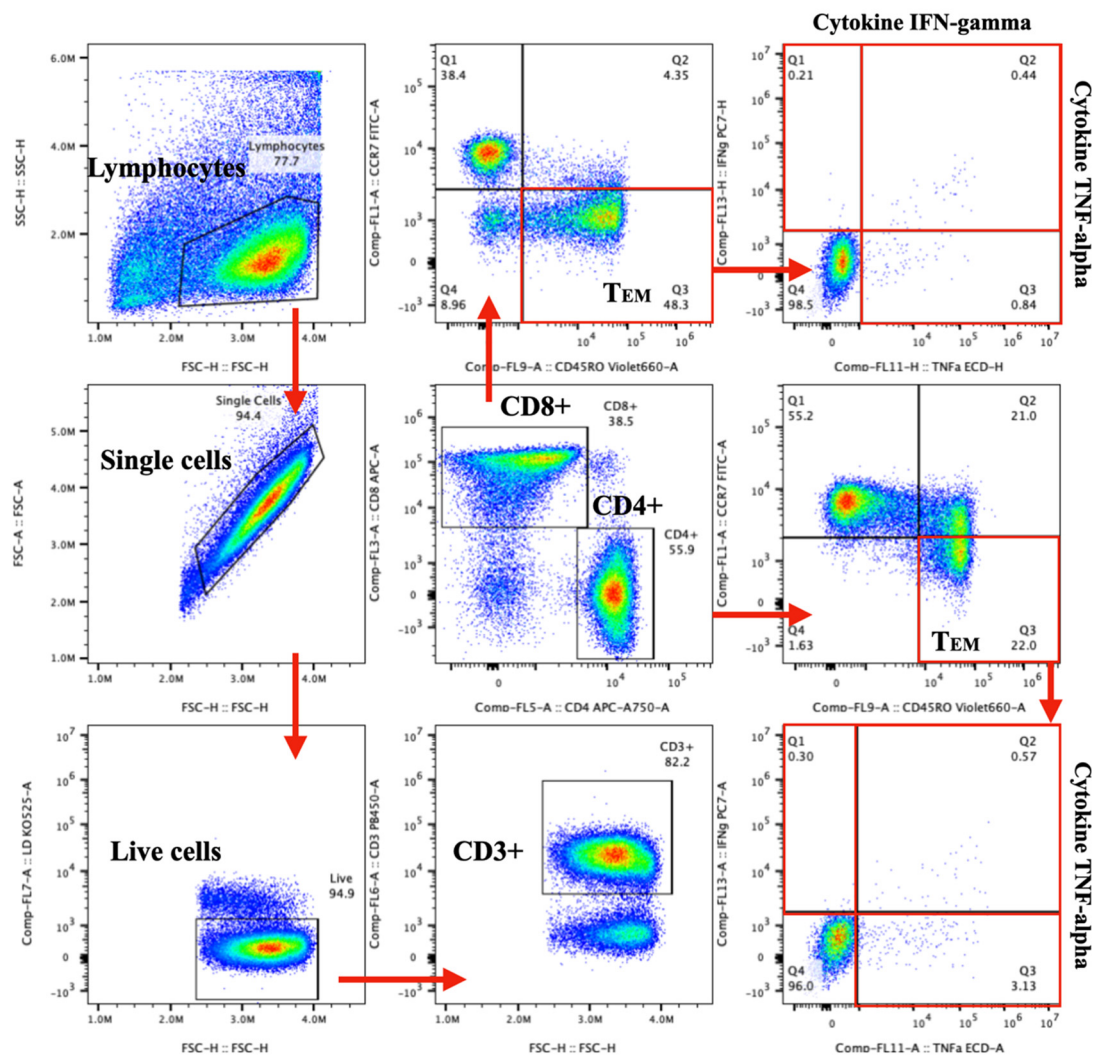

**Supplementary Figure S3.** Gating strategies for selecting CD4<sup>+</sup> and CD8<sup>+</sup> effector memory T cell (T<sub>EM</sub>) populations (CD45RO<sup>+</sup>CCR7<sup>+</sup>) and cytokine production.
